# Supplementary material for: Red, orange-red and near-infrared light emitting ternary lanthanide tris β-diketonate complexes with distortedC4vgeometrical structures
Source: Royal Society of Chemistry journal article supplement (doi:10.1039/c9dt00198k), 2019-01-01
Supplement: c9dt00198k1.pdf [file c9dt00198k1.pdf]

## Supplementary information

### **Red, Orange-red and Near infra-red Light Emitting Ternary Lanthanide tris $\beta$ -diketonate Complexes with Distorted $C_{4v}$ Geometrical Structures**

Zubair Ahmed and Khalid Iftikhar\*

Lanthanide Research Laboratory, Department of Chemistry, Jamia Millia Islamia University,  
New Delhi 110 025, India

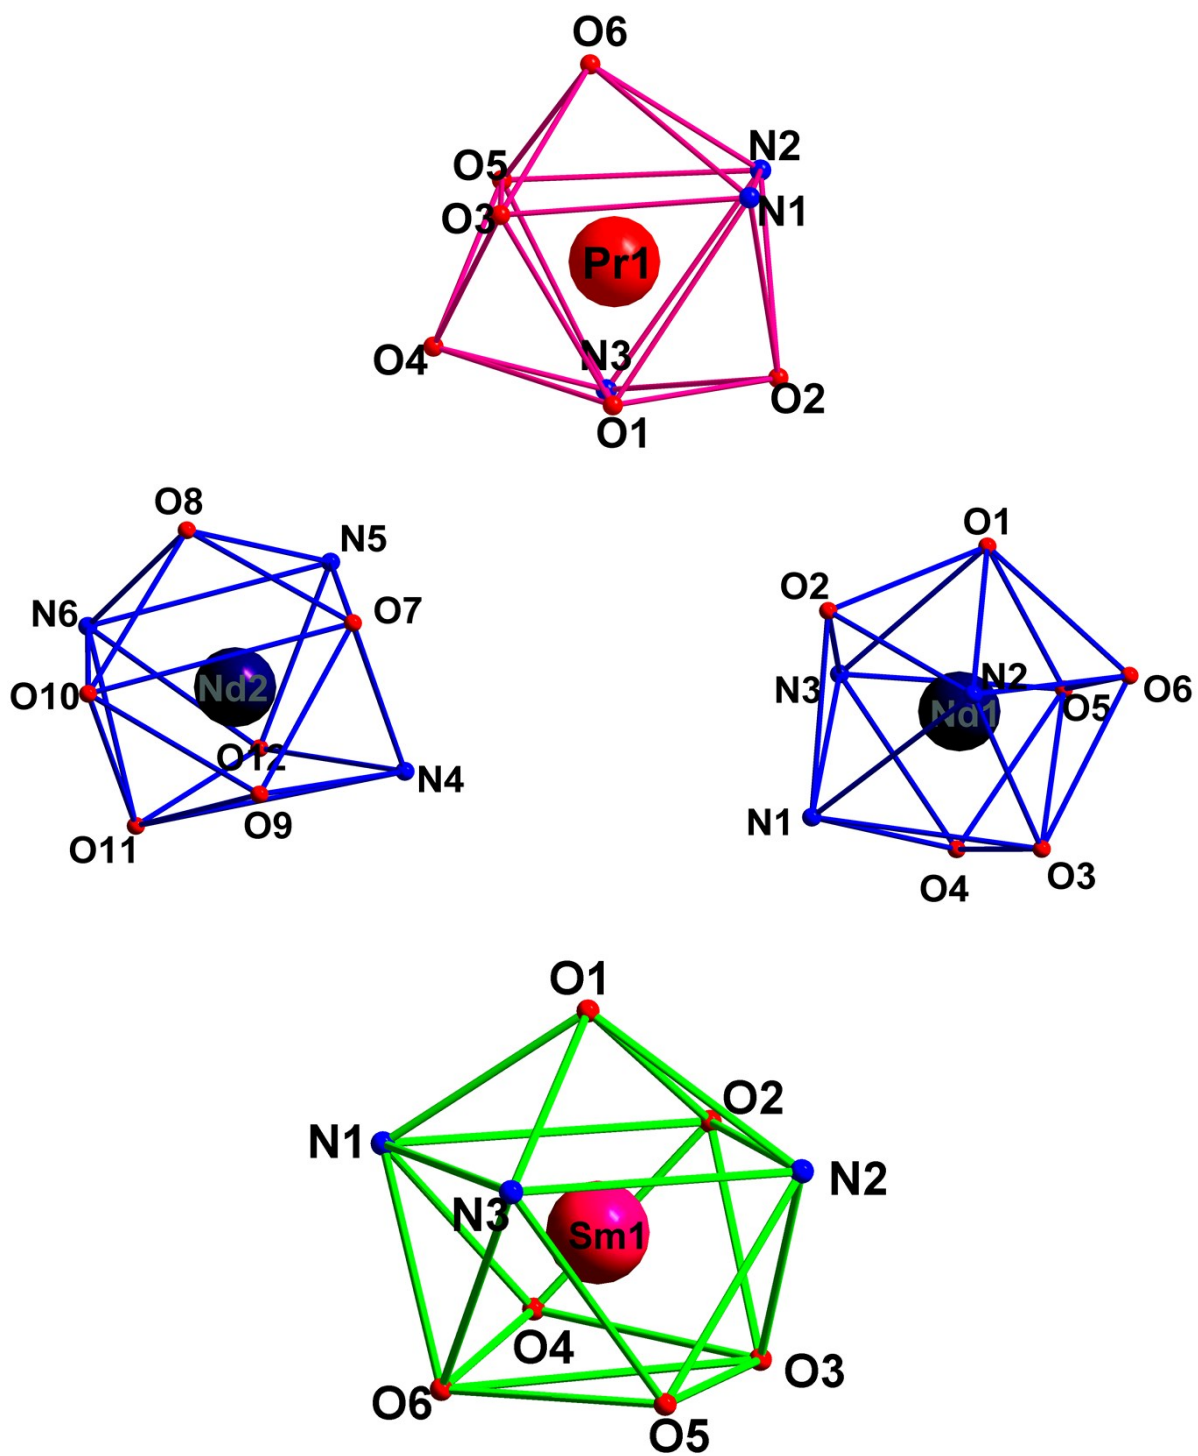

Figure S1. Coordination polyhedra of the complexes.

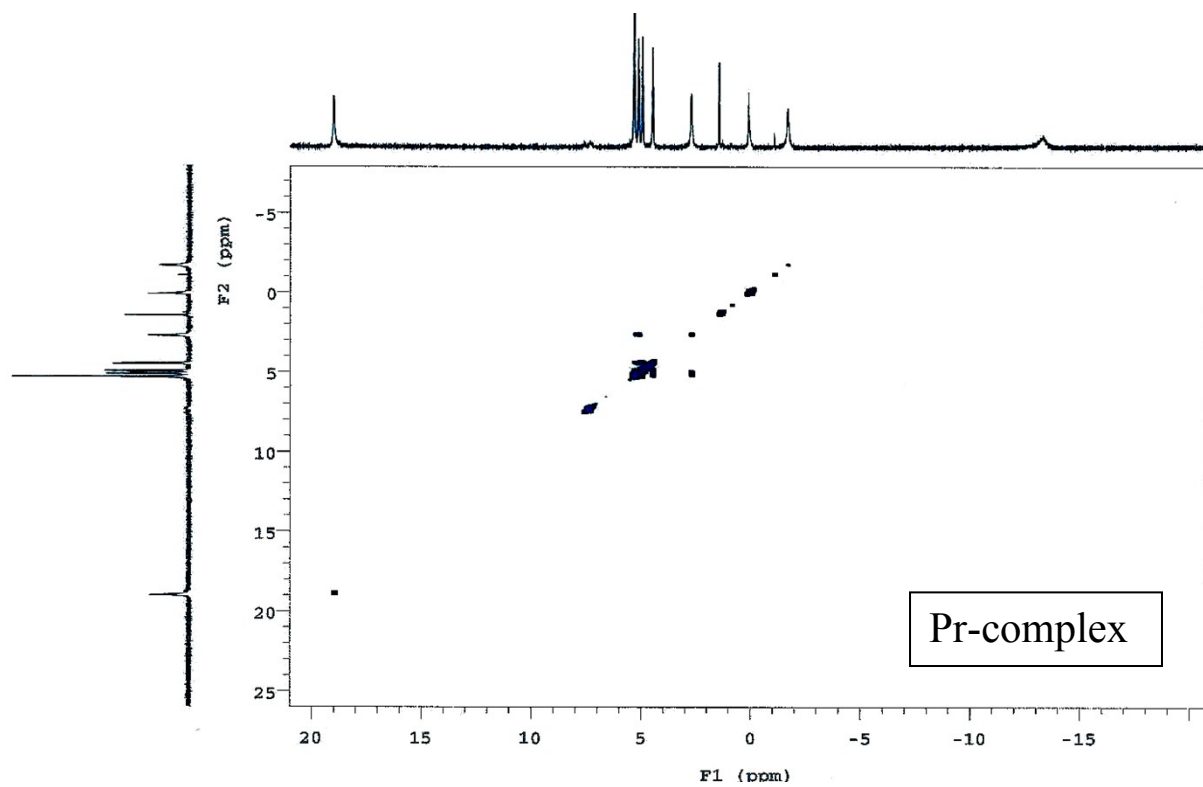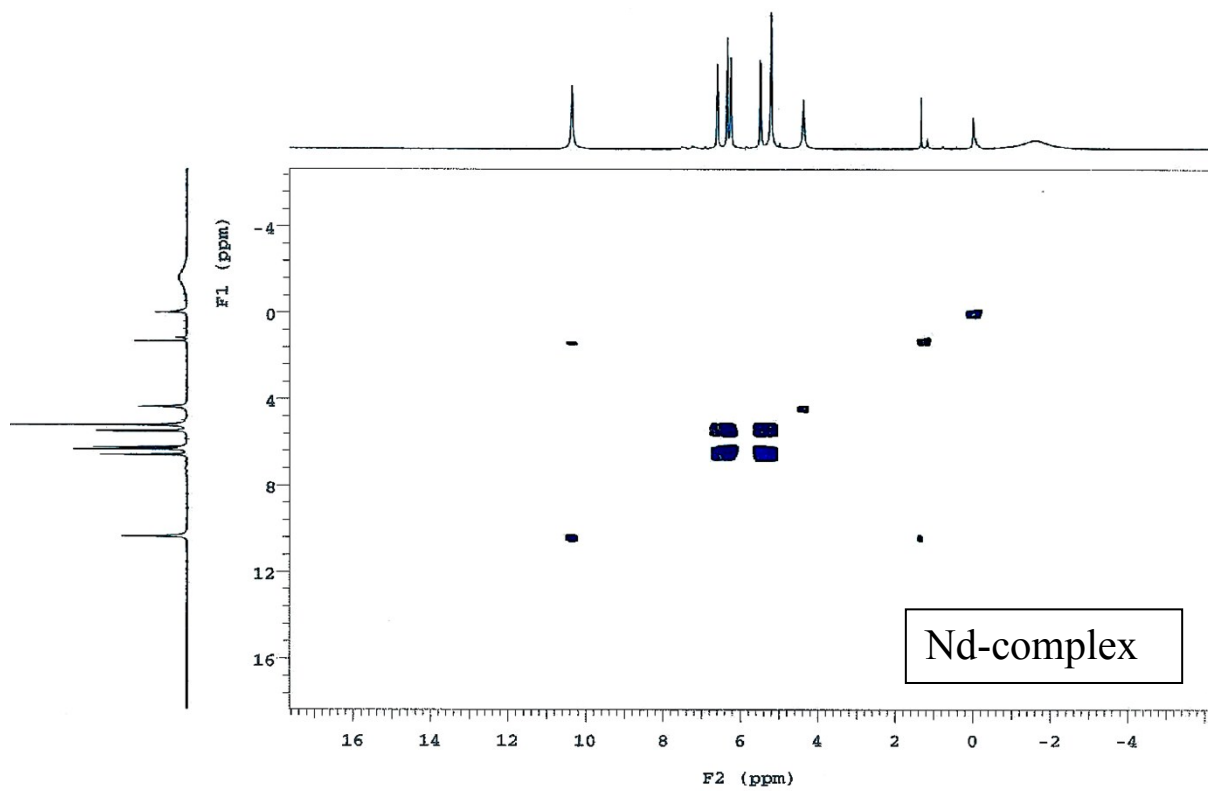

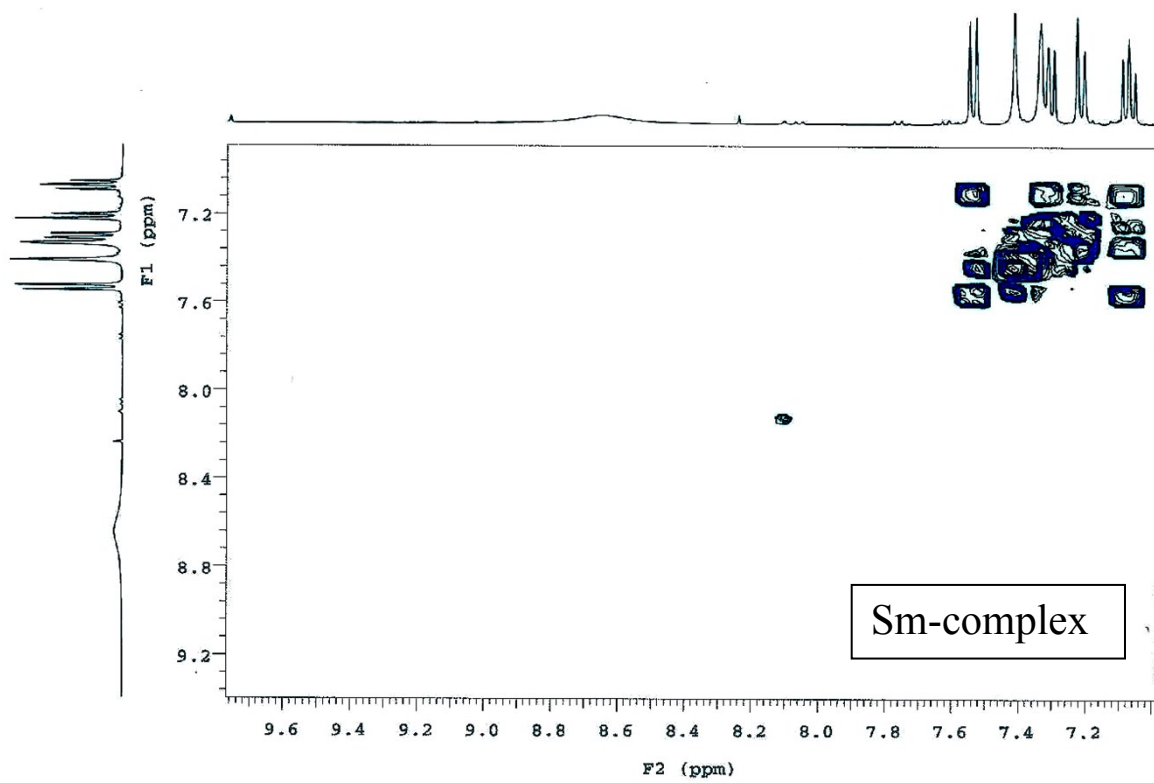

**Figure S2.** COSY-NMR spectra of the Pr, Nd and Sm complexes.

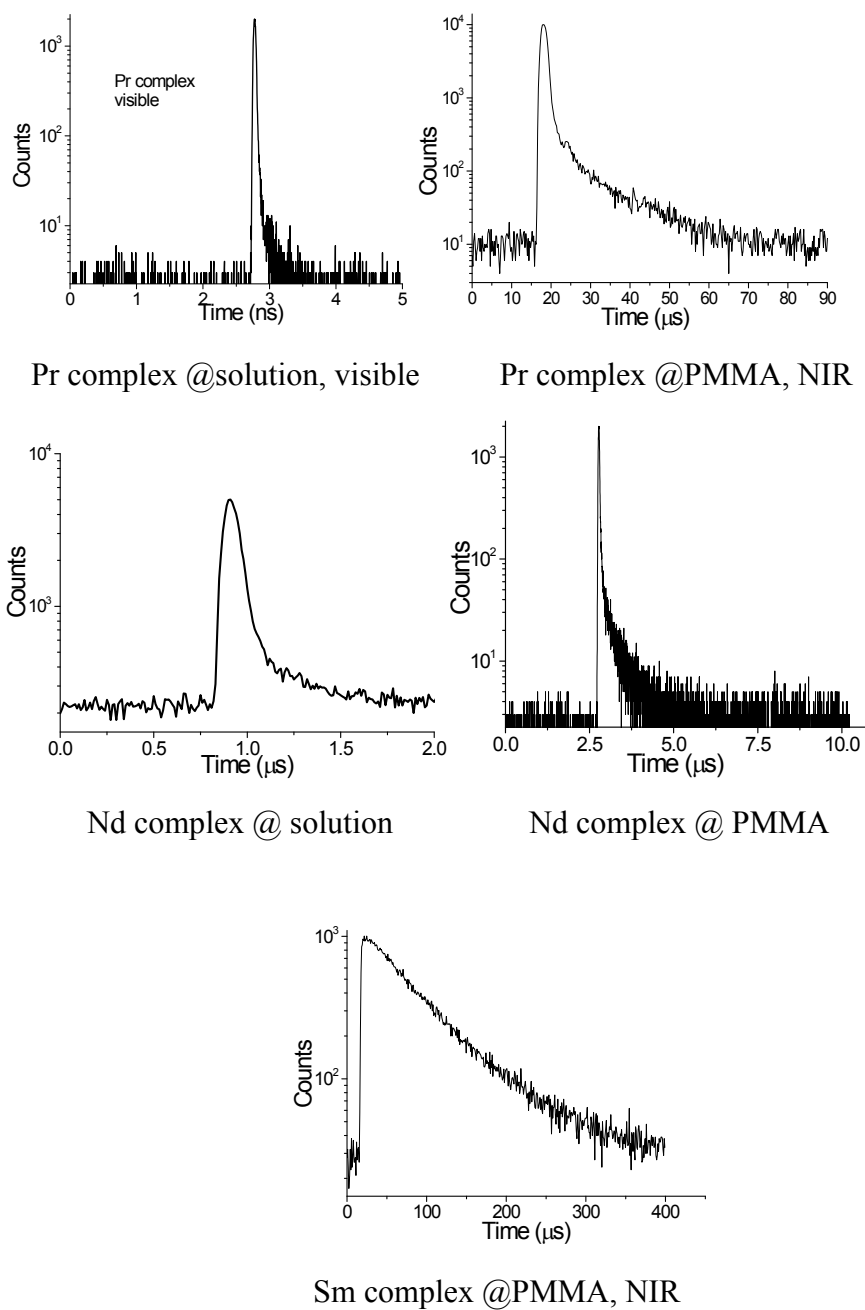

**Figure S3.** Emission lifetime decay profiles of the complexes.
